# Supplementary material
Source: publisher figshare collection journal article supplement (https://gsapubs.figshare.com/ndownloader/files/23309762)
Supplement: Supplementary file 1 [file 23309762]

Archive with 2 entries (2 files):
- 541-07_DR_table.xlsx
- 541-07_DR_figures.pdf
