# Supplementary material
Source: publisher figshare collection journal article supplement (https://gsapubs.figshare.com/ndownloader/files/23309762)
Supplement: Supplementary file 1 [file 23309762 › 541-07_DR_table.xlsx]

## Sheet: Data Repository Tables
Barnes, C.J., and Schneider, D.A., 2018, Late Cretaceous−Paleogene burial and exhumation history of the Southwestern Basement Province, Svalbard, revealed by zircon (U-Th)/He thermochronology, in Piepjohn, K., Strauss, J.V., Reinhardt, L., and McClelland, W.C., eds., Circum-Arctic Structural Events: Tectonic Evolution of the Arctic Margins and Trans-Arctic Links with Adjacent Orogens: Geological …
GSA Data Repository Item 2018274
									Table S1a. Continued												Table S1a. Continued												Table S1a. Continued
Table S1a. (U-Th)/He analyses of samples from Sørkapp Land, Southwestern Province, Svalbard	Region	Mineral	length 1 (μm)	width 1 (μm)	length 2 (μm)	width 2 (μm)	Dim Mass (μg)	ESR1 (μm)	Sample Name	Region	Mineral	4He (nmol/g)	±	U (ppm)	±	Th (ppm)	±	Sm (ppm)	±	eU2 (ppm)	Sample Name	Region	Mineral	4He (ncc)	±	U (ng)	±	Th (ng)	±	Sm (ng)	±	Th/U	Sample Name	Region	Mineral	Raw Date (Ma)	±	Ft3	± (%)	Corrected4 Date (Ma)	Full Unc. (Ma)	Analytic Unc. (Ma)
Sample Name	SKL	Zrn	236.3	214	236.3	170.5	40.0917	102.494	HL12_08_Zr1	SKL	Zrn	125.114	0.0549278	93.9997	0.0412678	109.165	1.8078	2.27091	4.39224	119.653	HL12_08_Zr1	SKL	Zrn	112.428	0.0493581	3.76861	0.102166	4.3766	0.0724778	N/A	N/A	1.16133	HL12_08_Zr1	SKL	Zrn	190.808	3.98812	0.881874	7	216.366	15.8064	3.98812
HL12_08_Zr1	SKL	Zrn	201.6	151.4	201.6	123	17.4572	76.7751	HL12_08_Zr2	SKL	Zrn	45.9206	0.0531278	66.6709	0.0771348	42.4011	0.730537	0.724628	1.27622	76.6351	HL12_08_Zr2	SKL	Zrn	17.9677	0.0207878	1.16389	0.0370691	0.740204	0.0127531	N/A	N/A	0.635976	HL12_08_Zr2	SKL	Zrn	110.083	2.96446	0.845653	7	130.175	9.76327	2.96446
HL12_08_Zr2	SKL	Zrn	249.6	112.6	249	104.7	13.6666	66.922	HL12_08_Zr3	SKL	Zrn	84.7431	0.0888552	109.785	0.115113	67.306	0.849436	2.30582	1.6924	125.602	HL12_08_Zr3	SKL	Zrn	25.9583	0.0272179	1.50039	0.0413023	0.919844	0.0116089	N/A	N/A	0.61307	HL12_08_Zr3	SKL	Zrn	123.798	2.89175	0.824303	7	150.185	11.0828	2.89175
HL12_08_Zr3	SKL	Zrn	144	108.3	144	99.6	7.22276	57.2859	HL12_08_Zr4	SKL	Zrn	125.251	0.103475	174.768	0.144383	127.312	3.8192	1.08815	2.62386	204.686	HL12_08_Zr4	SKL	Zrn	20.2766	0.0167514	1.26231	0.027753	0.919545	0.0275852	N/A	N/A	0.728465	HL12_08_Zr4	SKL	Zrn	112.393	2.10293	0.796293	7	141.145	10.227	2.10293
HL12_08_Zr4	SKL	Zrn	203.6	106.3	203.6	104	10.4664	62.6775	HL12_08_Zr5	SKL	Zrn	221.26	0.208748	290.298	0.273883	85.2467	2.10433	1.94763	1.6606	310.331	HL12_08_Zr5	SKL	Zrn	51.9053	0.0489702	3.03837	0.0654151	0.892226	0.0220248	N/A	N/A	0.293652	HL12_08_Zr5	SKL	Zrn	130.773	2.56182	0.814372	7	160.582	11.6726	2.56182
HL12_08_Zr5	SKL	Zrn	227.7	112.4	232.2	97.4	11.7061	63.9454	HL12_08_Zr6	SKL	Zrn	255.095	0.201063	187.554	0.147828	132.276	2.31027	2.6792	1.97277	218.639	HL12_08_Zr6	SKL	Zrn	66.9307	0.0527539	2.19553	0.0454781	1.54844	0.0270442	N/A	N/A	0.70527	HL12_08_Zr6	SKL	Zrn	212.493	3.69512	0.816296	7	260.314	18.7758	3.69512
HL12_08_Zr6	SKL	Zrn	167.6	111.4	160.7	80	6.80251	55.8343	HL12_09_Zr1	SKL	Zrn	51.7434	0.0419797	49.2652	2.41093	14.3749	0.70856	N/A	N/A	52.6433	HL12_09_Zr1	SKL	Zrn	7.88925	0.00640059	0.335127	0.0164004	0.0977855	0.00195221	N/A	N/A	0.291787	HL12_09_Zr1	SKL	Zrn	179.507	7.96521	0.793202	7	226.306	18.7561	7.96521
HL12_09_Zr1	SKL	Zrn	153.6	69.4	150.1	46.7	2.28846	36.618	HL12_09_Zr2	SKL	Zrn	109.272	0.0894632	150.08	3.96192	57.2669	1.5227	N/A	N/A	163.538	HL12_09_Zr2	SKL	Zrn	5.60488	0.00458881	0.343453	0.0090667	0.131053	0.00275259	N/A	N/A	0.381576	HL12_09_Zr2	SKL	Zrn	122.646	2.88625	0.69561	21.1446	176.314	37.5111	2.88625
HL12_09_Zr2	SKL	Zrn	136.1	108.5	136.1	79.6	5.4658	52.424	HL12_09_Zr3	SKL	Zrn	56.2047	0.0329356	64.5224	2.58303	34.9366	1.40873	3.0749	0.123988	72.7325	HL12_09_Zr3	SKL	Zrn	6.88554	0.00403488	0.352666	0.0141183	0.190956	0.00445283	N/A	N/A	0.541465	HL12_09_Zr3	SKL	Zrn	141.552	4.87961	0.779591	7	181.572	14.1677	4.87961
HL12_09_Zr3	SKL	Zrn	163.7	65	162.8	50.7	2.50166	36.8723	HL12_09_Zr4	SKL	Zrn	0.0320059	0.0037099	0.0358806	0.15354	0.561917	2.42192	2.44301	10.5296	0.167931	HL12_09_Zr4	SKL	Zrn	0.0017946	0.000208018	8.9761e-05	0.000384104	0.00140572	0.000182804	N/A	N/A	15.6607	HL12_09_Zr4	SKL	Zrn	31.3207	26.8669	0.675066	9.95877	46.3965	40.0662	26.8669
HL12_09_Zr4	SKL	Zrn	133	60.2	133.9	56.7	2.11812	35.9401	HL12_09_Zr5	SKL	Zrn	248.847	0.177157	308.249	17.3614	90.9134	5.15749	5.48658	0.311252	329.613	HL12_09_Zr5	SKL	Zrn	11.814	0.0084105	0.652908	0.0367736	0.192566	0.00992007	N/A	N/A	0.294935	HL12_09_Zr5	SKL	Zrn	138.369	7.07243	0.691094	8.63401	200.217	20.0888	7.07243
HL12_09_Zr5	SKL	Zrn	183.3	82.6	183.3	63.7	4.48472	45.7364	HL12_09_Zr6	SKL	Zrn	61.3377	0.0526581	64.3699	3.38109	25.9254	1.3716	0.0722673	0.00382334	70.4624	HL12_09_Zr6	SKL	Zrn	6.16558	0.00529312	0.288681	0.0151632	0.116268	0.00616582	N/A	N/A	0.402757	HL12_09_Zr6	SKL	Zrn	159.266	7.43644	0.750827	7	212.121	17.8486	7.43644
HL12_09_Zr6	SKL	Zrn	244.3	86.8	244.3	66.8	6.58677	49.776	HL12_09_Zr7	SKL	Zrn	202.02	0.165073	137.604	1.71701	83.968	1.05532	0.61857	0.00777423	157.336	HL12_09_Zr7	SKL	Zrn	29.8249	0.0243703	0.906365	0.0113095	0.553078	0.0246995	N/A	N/A	0.610216	HL12_09_Zr7	SKL	Zrn	233.432	2.80288	0.768475	7	303.76	21.5738	2.80288
HL12_09_Zr7	SKL	Zrn	136.4	66.9	123.6	54.2	2.1919	37.1637	HL12_09_Zr8	SKL	Zrn	217.51	0.182883	204.353	5.7164	85.1443	2.39897	10.7305	0.302336	224.362	HL12_09_Zr8	SKL	Zrn	10.6859	0.00898474	0.447922	0.0125298	0.186628	0.0105122	N/A	N/A	0.416653	HL12_09_Zr8	SKL	Zrn	177.028	4.45894	0.699372	8.0156	253.124	21.2675	4.45894
HL12_09_Zr8	SKL	Zrn	189.7	136.7	187.2	110.6	13.2487	69.9426	HL12_10_Zr1	SKL	Zrn	305.875	0.179724	231.822	6.31881	160.111	4.39569	1.52368	0.0418312	269.448	HL12_10_Zr1	SKL	Zrn	90.8299	0.0533691	3.07134	0.0837159	2.12126	0.0223392	N/A	N/A	0.690661	HL12_10_Zr1	SKL	Zrn	206.855	4.70476	0.831224	7	248.856	18.3164	4.70476
HL12_10_Zr1	SKL	Zrn	535.6	207.4	535	167.2	86.3168	119.568	HL12_10_Zr2	SKL	Zrn	167.975	0.116221	89.7774	1.82784	67.7866	1.39009	1.26643	0.0259704	105.707	HL12_10_Zr2	SKL	Zrn	324.976	0.224849	7.74929	0.157773	5.85112	0.073761	N/A	N/A	0.755052	HL12_10_Zr2	SKL	Zrn	287.604	4.84611	0.898902	7	319.951	23.0363	4.84611
HL12_10_Zr2	SKL	Zrn	228.6	107.1	233.8	94.6	10.8923	61.9684	HL12_10_Zr3	SKL	Zrn	191.536	0.148343	138.056	4.28805	57.2262	1.7903	0	0	151.504	HL12_10_Zr3	SKL	Zrn	46.7609	0.0362159	1.50375	0.0467069	0.623327	0.0129899	N/A	N/A	0.414514	HL12_10_Zr3	SKL	Zrn	229.871	6.3154	0.811887	7	283.132	21.2911	6.3154
HL12_10_Zr3	SKL	Zrn	199.5	105.1	207.8	76.8	7.64366	55.5501	HL12_10_Zr4	SKL	Zrn	0.0436671	0.0128114	171.592	5.18599	76.1908	2.31933	1.07214	0.0326371	189.497	HL12_10_Zr4	SKL	Zrn	0.00748112	0.00219488	1.31159	0.03964	0.582377	0.0316567	N/A	N/A	0.444022	HL12_10_Zr4	SKL	Zrn	0.0427486	0.012595	0.791535	7	0.0540072	0.016355	0.012595
HL12_10_Zr4	SKL	Zrn	378.8	199.1	377.9	172.1	60.2836	111.809	HL12_10_Zr5	SKL	Zrn	130.551	0.108842	107.464	2.13994	43.0856	0.864167	0.23425	0.00469835	117.589	HL12_10_Zr5	SKL	Zrn	176.397	0.147064	6.47832	0.129003	2.59735	0.050363	N/A	N/A	0.40093	HL12_10_Zr5	SKL	Zrn	202.355	3.58523	0.892874	7	226.633	16.3646	3.58523
HL12_10_Zr5	SKL	Zrn	267.5	94.8	268.5	93.6	11.0579	60.0727	HL12_10_Zr6	SKL	Zrn	94.7012	0.0756816	84.8552	1.75463	33.5474	0.698705	0.808098	0.0168306	92.7388	HL12_10_Zr6	SKL	Zrn	23.4714	0.0187574	0.938318	0.0194025	0.370963	0.0104448	N/A	N/A	0.395349	HL12_10_Zr6	SKL	Zrn	186.373	3.44637	0.806411	7	231.114	16.7329	3.44637
HL12_10_Zr6	SKL	Zrn	137	118.4	129.6	118.7	8.71135	62.0609	HL12_11_Zr1	SKL	Zrn	223.906	0.20187	219.633	5.5399	20.7866	0.5281	2.3226	0.0590075	224.517	HL12_11_Zr1	SKL	Zrn	43.7183	0.0394156	1.9133	0.0482601	0.181079	0.007508	N/A	N/A	0.0946426	HL12_11_Zr1	SKL	Zrn	182.06	4.3579	0.813515	7	223.795	16.5562	4.3579
HL12_11_Zr1	SKL	Zrn	156.5	131.4	150.5	129.7	12.1646	69.0939	HL12_11_Zr2	SKL	Zrn	44.1259	0.0439536	72.9902	0.0727051	54.7898	1.6077	1.18348	1.68836	85.8658	HL12_11_Zr2	SKL	Zrn	12.031	0.011984	0.887894	0.0159185	0.666494	0.019557	N/A	N/A	0.750646	HL12_11_Zr2	SKL	Zrn	94.522	1.45837	0.829077	7	114.009	8.17216	1.45837
HL12_11_Zr2	SKL	Zrn	171.4	76.8	168.6	62.8	3.81261	43.4939	HL12_11_Zr3	SKL	Zrn	64.2542	0.0361053	173.026	0.0972255	145.022	3.08116	4.16868	5.33852	207.106	HL12_11_Zr3	SKL	Zrn	5.49081	0.00308535	0.659681	0.0179126	0.552911	0.0117473	N/A	N/A	0.838149	HL12_11_Zr3	SKL	Zrn	57.2336	1.27223	0.736958	7	77.662	5.70386	1.27223
HL12_11_Zr3	SKL	Zrn	236.2	124.6	236.2	102	13.9589	68.5371	HL12_11_Zr4	SKL	Zrn	139.372	0.11209	100.587	2.19872	117.13	2.57882	3.15434	0.0694482	128.113	HL12_11_Zr4	SKL	Zrn	43.605	0.0350694	1.40409	0.0306916	1.635	0.0310357	N/A	N/A	1.16446	HL12_11_Zr4	SKL	Zrn	198.388	3.39434	0.826569	7	240.014	17.2955	3.39434
HL12_11_Zr4	SKL	Zrn	174.2	74.9	173.7	66.9	4.05308	44.1836	HL12_11_Zr5	SKL	Zrn	37.3698	0.0356214	66.446	2.39109	59.6682	2.16271	4.68357	0.169759	80.468	HL12_11_Zr5	SKL	Zrn	3.39482	0.003236	0.269311	0.0096913	0.24184	0.00539311	N/A	N/A	0.897995	HL12_11_Zr5	SKL	Zrn	85.4425	2.47857	0.740427	7	115.396	8.74389	2.47857
HL12_11_Zr5	SKL	Zrn	155.7	127.4	155.7	77.7	7.16691	57.8586	HL12_11_Zr6	SKL	Zrn	54.3356	0.0429133	61.9968	2.11966	48.9733	1.68648	1.58921	0.0547274	73.5055	HL12_11_Zr6	SKL	Zrn	8.72827	0.00689344	0.444325	0.0151914	0.350987	0.0119061	N/A	N/A	0.789932	HL12_11_Zr6	SKL	Zrn	135.49	3.84975	0.797949	7	169.798	12.8277	3.84975
HL12_11_Zr6	1Equivalent spherical radius									2Effective uranium																								3Alpha-ejection correction			4Calculated by dividing raw date by alpha-ejection correction
									Table S1b. Continued												Table S1b. Continued												Table S1b. Continued
Table S1b. (U-Th)/He analyses of samples from Wedel Jarlsberg Land, Southwestern Province, Svalbard	Region	Mineral	length 1 (μm)	width 1 (μm)	length 2 (μm)	width 2 (μm)	Dim Mass (μg)	ESR1 (μm)	Sample Name	Region	Mineral	4He (nmol/g)	±	U (ppm)	±	Th (ppm)	±	Sm (ppm)	±	eU2 (ppm)	Sample Name	Region	Mineral	4He (ncc)	±	U (ng)	±	Th (ng)	±	Sm (ng)	±	Th/U	Sample Name	Region	Mineral	Raw Date (Ma)	±	Ft3	± (%)	Corrected4 Date (Ma)	Full Unc. (Ma)	Analytic Unc. (Ma)
Sample Name	WJL	Zrn	133.2	72.7	137	78.9	3.60346	44.2573	HL12_12_Zr1	WJL	Zrn	39.8101	0.0336636	161.889	1.64453	84.2812	1.47965	0	0	181.695	HL12_12_Zr1	WJL	Zrn	3.21532	0.00271889	0.58336	0.00592599	0.303704	0.00533185	N/A	N/A	0.520611	HL12_12_Zr1	WJL	Zrn	40.5004	0.364924	0.742619	10.8011	54.5372	5.9111	0.364924
HL12_12_Zr1	WJL	Zrn	150.9	55.6	155	46.2	1.82692	32.6658	HL12_12_Zr2	WJL	Zrn	51.1554	0.0895264	177.528	3.37842	75.4079	1.09742	0	0	195.248	HL12_12_Zr2	WJL	Zrn	2.0947	0.00366591	0.324328	0.0061721	0.137764	0.0020049	N/A	N/A	0.424767	HL12_12_Zr2	WJL	Zrn	48.4037	0.817735	0.663028	27.1271	73.0039	19.8422	0.817735
HL12_12_Zr2	WJL	Zrn	154	75.9	156	68	3.71993	43.7438	HL12_12_Zr3	WJL	Zrn	155.563	0.192561	248.948	2.69075	108.164	1.53294	0	0	274.366	HL12_12_Zr3	WJL	Zrn	12.9704	0.0160552	0.92607	0.0100094	0.402362	0.00570245	N/A	N/A	0.434483	HL12_12_Zr3	WJL	Zrn	104.238	1.00749	0.740329	12.4988	140.799	17.6508	1.00749
HL12_12_Zr3	WJL	Zrn	140.5	53.1	141.8	46.3	1.61365	31.673	HL12_12_Zr4	WJL	Zrn	93.4025	0.115284	330.327	5.57415	130.299	1.60656	0	0	360.947	HL12_12_Zr4	WJL	Zrn	3.37815	0.00416957	0.533032	0.00899473	0.210257	0.00259242	N/A	N/A	0.394454	HL12_12_Zr4	WJL	Zrn	47.8114	0.719011	0.654051	28.2333	73.1004	20.6679	0.719011
HL12_12_Zr4	WJL	Zrn	150.9	62.5	151.6	54.4	2.39126	36.7249	HL12_12_Zr5	WJL	Zrn	115.274	0.104817	428.309	5.85632	144.224	4.24118	11.2555	33.587	462.202	HL12_12_Zr5	WJL	Zrn	6.17832	0.00561785	1.0242	0.014004	0.344877	0.0101418	N/A	N/A	0.336728	HL12_12_Zr5	WJL	Zrn	46.0822	0.576247	0.696691	20.8407	66.1445	13.8098	0.576247
HL12_12_Zr5	WJL	Zrn	153.5	52.2	158	43.9	1.65965	31.1604	HL12_12_Zr6	WJL	Zrn	94.8895	0.11873	264.18	3.16927	93.7913	0.753109	0	0	286.221	HL12_12_Zr6	WJL	Zrn	3.52977	0.0044166	0.438445	0.00525987	0.155661	0.0012499	N/A	N/A	0.355029	HL12_12_Zr6	WJL	Zrn	61.1852	0.661493	0.649403	29.8024	94.2175	28.0975	0.661493
HL12_12_Zr6	WJL	Zrn	149.6	67.5	149.2	56	2.626	38.3895	HL12_12_Zr7	WJL	Zrn	109.998	0.0785637	500.349	11.0696	66.7603	0.998203	0	0	516.038	HL12_12_Zr7	WJL	Zrn	6.47427	0.00462412	1.31392	0.0290687	0.175313	0.00262128	N/A	N/A	0.133427	HL12_12_Zr7	WJL	Zrn	39.4305	0.820019	0.709808	18.4582	55.551	10.3186	0.820019
HL12_12_Zr7	WJL	Zrn	155	56.7	154.5	51.7	2.10939	34.6005	HL12_12_Zr8	WJL	Zrn	128.876	0.16623	236.182	4.18335	124.673	1.65572	0	0	265.48	HL12_12_Zr8	WJL	Zrn	6.09315	0.0078592	0.4982	0.00882432	0.262983	0.00349257	N/A	N/A	0.527867	HL12_12_Zr8	WJL	Zrn	89.3551	1.37397	0.67897	24.2363	131.604	31.9601	1.37397
HL12_12_Zr8	WJL	Zrn	145	120.5	145	101.9	8.27908	60.2841	HL12_14_Zr1	WJL	Zrn	167.754	0.13649	146.497	2.80665	167.867	2.1356	0.700838	2.61082	185.946	HL12_14_Zr1	WJL	Zrn	31.1291	0.0253277	1.21286	0.0232365	1.38979	0.0176808	N/A	N/A	1.14587	HL12_14_Zr1	WJL	Zrn	164.983	2.45264	0.8044	7	205.101	14.6772	2.45264
HL12_14_Zr1	WJL	Zrn	198.9	94.8	198.9	72	6.3129	51.709	HL12_14_Zr2	WJL	Zrn	26.747	0.023297	52.647	1.25452	56.1647	0.996304	0.0617894	3.41832	65.8457	HL12_14_Zr2	WJL	Zrn	3.78456	0.0032964	0.332355	0.00791962	0.354562	0.00628956	N/A	N/A	1.06682	HL12_14_Zr2	WJL	Zrn	74.8239	1.4061	0.774677	8.33751	96.5872	8.25499	1.4061
HL12_14_Zr2	WJL	Zrn	175.1	90.8	175.1	71	5.24908	49.2888	HL12_14_Zr3	WJL	Zrn	21.398	0.0292289	79.4292	1.12796	32.7406	0.762957	0	0	87.1233	HL12_14_Zr3	WJL	Zrn	2.5175	0.0034388	0.416931	0.00592074	0.171858	0.00400482	N/A	N/A	0.412199	HL12_14_Zr3	WJL	Zrn	45.3875	0.579944	0.767299	9.01786	59.1523	5.38756	0.579944
HL12_14_Zr3	WJL	Zrn	247.4	77.8	247.4	86.4	7.73296	52.8121	HL12_14_Zr4	WJL	Zrn	23.3498	0.0233054	71.5795	0.917468	44.5104	0.673622	16.2614	21.5913	82.0395	HL12_14_Zr4	WJL	Zrn	4.04706	0.00403937	0.553522	0.00709474	0.344198	0.0052091	N/A	N/A	0.621832	HL12_14_Zr4	WJL	Zrn	52.4633	0.589363	0.780746	8.67538	67.1964	5.87821	0.589363
HL12_14_Zr4	WJL	Zrn	186.2	77.9	186.2	74.8	5.04512	47.5199	HL12_14_Zr5	WJL	Zrn	172.483	0.166863	766.708	12.326	253.638	1.74167	51.6666	49.4681	826.313	HL12_14_Zr5	WJL	Zrn	19.5043	0.0188688	3.86814	0.0621861	1.27963	0.00878694	N/A	N/A	0.330814	HL12_14_Zr5	WJL	Zrn	38.5827	0.558871	0.759773	10.5833	50.7819	5.4245	0.558871
HL12_14_Zr5	WJL	Zrn	162.2	53	165.4	60.2	2.43018	36.1438	HL12_14_Zr6	WJL	Zrn	267.067	0.244454	1531.17	27.0102	480.462	3.92076	0	0	1644.07	HL12_14_Zr6	WJL	Zrn	14.5469	0.0133152	3.72101	0.0656398	1.16761	0.00952817	N/A	N/A	0.313788	HL12_14_Zr6	WJL	Zrn	30.0645	0.479347	0.692512	22.2735	43.4137	9.6945	0.479347
HL12_14_Zr6	WJL	Zrn	210.8	78.6	210.8	70.9	5.46251	47.6195	HL12_14_Zr7	WJL	Zrn	156.468	0.109767	683.413	13.1634	364.81	9.12024	0.116039	4.00117	769.143	HL12_14_Zr7	WJL	Zrn	19.1571	0.0134393	3.73315	0.0719053	1.99278	0.0498194	N/A	N/A	0.533806	HL12_14_Zr7	WJL	Zrn	37.612	0.632466	0.759216	11.2341	49.5406	5.62746	0.632466
HL12_14_Zr7	WJL	Zrn	161.6	76.4	161.6	69.1	3.96703	44.5374	HL12_14_Zr8	WJL	Zrn	54.1673	0.0457772	147.413	2.76778	42.7077	0.597992	0	0	157.449	HL12_14_Zr8	WJL	Zrn	4.81631	0.00407031	0.584792	0.0109799	0.169423	0.00237225	N/A	N/A	0.289715	HL12_14_Zr8	WJL	Zrn	63.4855	1.0835	0.745339	12.1211	85.1767	10.4262	1.0835
HL12_14_Zr8	WJL	Zrn	200.1	66.6	202	64.7	4.02843	42.2987	HL12_15_Zr2	WJL	Zrn	0.158056	0.00386872	1.06786	0.0261379	2.40403	0.151133	0	0	1.63281	HL12_15_Zr2	WJL	Zrn	0.0142712	0.000349313	0.00430181	0.000744805	0.00968446	0.000608829	N/A	N/A	2.25125	HL12_15_Zr2	WJL	Zrn	17.8867	2.04151	0.725051	7	24.6696	3.30305	2.04151
HL12_15_Zr2	WJL	Zrn	210.7	73.9	212.7	73.4	5.33967	47.0197	HL12_15_Zr3	WJL	Zrn	24.0067	0.0274231	60.813	0.0694675	332.329	5.5845	1.9672	3.58437	138.91	HL12_15_Zr3	WJL	Zrn	2.87315	0.00328203	0.324721	0.0134741	1.77453	0.0298194	N/A	N/A	5.46477	HL12_15_Zr3	WJL	Zrn	31.8388	0.634721	0.744759	7	42.7505	3.11153	0.634721
HL12_15_Zr3	WJL	Zrn	192	94.2	193.3	81.4	6.86906	53.5956	HL12_15_Zr4	WJL	Zrn	246.03	0.250939	207.612	0.211755	133.494	5.1452	0.780949	3.8341	238.983	HL12_15_Zr4	WJL	Zrn	37.8789	0.0386347	1.4261	0.0533268	0.916975	0.0353427	N/A	N/A	0.642994	HL12_15_Zr4	WJL	Zrn	187.894	5.98641	0.78363	7	239.774	18.4409	5.98641
HL12_15_Zr4	WJL	Zrn	162.2	81.9	158.7	77.4	4.72953	47.9615	HL12_15_Zr5	WJL	Zrn	46.6101	0.0419875	189.809	0.170985	201.871	6.88834	0.458969	5.18453	237.249	HL12_15_Zr5	WJL	Zrn	4.94094	0.00445091	0.897709	0.018564	0.954756	0.0325786	N/A	N/A	1.06355	HL12_15_Zr5	WJL	Zrn	36.2995	0.632998	0.758523	7	47.8555	3.45227	0.632998
HL12_15_Zr5	WJL	Zrn	165.4	120.7	166.4	114.9	10.6986	65.1498	HL12_15_Zr6	WJL	Zrn	52.7919	0.0520698	155.37	0.153245	131.971	2.42003	0.30551	2.64635	186.383	HL12_15_Zr6	WJL	Zrn	12.6592	0.012486	1.66224	0.0601626	1.4119	0.0258909	N/A	N/A	0.849395	HL12_15_Zr6	WJL	Zrn	52.2806	1.53501	0.819022	7	63.8329	4.84545	1.53501
HL12_15_Zr6	WJL	Zrn	204	99.6	206.7	96.3	9.15869	59.2404	HL12_15_Zr7	WJL	Zrn	7.76595	0.0105345	46.8047	0.0634906	27.1401	0.517417	0.482194	2.27304	53.1826	HL12_15_Zr7	WJL	Zrn	1.59419	0.00216252	0.42867	0.0161078	0.248568	0.00473886	N/A	N/A	0.579859	HL12_15_Zr7	WJL	Zrn	27.0186	0.867674	0.803128	7	33.6417	2.59091	0.867674
HL12_15_Zr7	WJL	Zrn	176.1	172.1	176.1	126.5	17.8272	78.6393	HL12_17_Zr1	WJL	Zrn	53.5463	0.0552146	144.256	0.148751	116.911	3.83221	0.261721	1.14156	171.73	HL12_17_Zr1	WJL	Zrn	21.3956	0.0220622	2.57169	0.0484652	2.08419	0.0683176	N/A	N/A	0.810438	HL12_17_Zr1	WJL	Zrn	57.5301	0.933971	0.848647	7	67.7903	4.87127	0.933971
HL12_17_Zr1	WJL	Zrn	205.1	113.7	205.1	98.1	10.6377	63.1276	HL12_17_Zr2	WJL	Zrn	41.31	0.0364556	116.265	0.102603	266.227	3.63218	0	0	178.829	HL12_17_Zr2	WJL	Zrn	9.84952	0.00869208	1.2368	0.0285107	2.83205	0.0386381	N/A	N/A	2.28982	HL12_17_Zr2	WJL	Zrn	42.6099	0.650665	0.809941	7	52.6086	3.76921	0.650665
HL12_17_Zr2	WJL	Zrn	149.1	115	148.9	119.2	9.49759	63.0614	HL12_17_Zr3	WJL	Zrn	28.2983	0.0367225	74.9333	0.0972403	84.3247	1.01804	0.0656762	1.78372	94.7496	HL12_17_Zr3	WJL	Zrn	6.02401	0.0078173	0.711686	0.019982	0.800881	0.00966891	N/A	N/A	1.12533	HL12_17_Zr3	WJL	Zrn	55.0976	1.19326	0.812544	7	67.8088	4.9686	1.19326
HL12_17_Zr3	WJL	Zrn	178	81.9	178.7	65	4.41492	45.6657	HL12_17_Zr4	WJL	Zrn	42.487	0.038117	94.6279	0.0848948	113.93	3.13448	0	0	121.402	HL12_17_Zr4	WJL	Zrn	4.20428	0.00377184	0.417775	0.00710444	0.502994	0.0138385	N/A	N/A	1.20398	HL12_17_Zr4	WJL	Zrn	64.5102	0.917833	0.746883	7	86.3726	6.16971	0.917833
HL12_17_Zr4	WJL	Zrn	145.6	62.2	147.5	53.8	2.2804	36.2749	HL12_17_Zr5	WJL	Zrn	82.5495	0.0879988	170.103	0.181332	122.424	5.52136	0.57989	8.83086	198.873	HL12_17_Zr5	WJL	Zrn	4.21927	0.0044978	0.387904	0.014943	0.279175	0.0125909	N/A	N/A	0.719703	HL12_17_Zr5	WJL	Zrn	76.4723	2.49066	0.691001	7	110.669	8.5443	2.49066
HL12_17_Zr5	WJL	Zrn	200.6	92.7	200.6	83.1	7.18563	54.0771	HL12_17_Zr6	WJL	Zrn	21.9054	0.0213844	36.3945	0.0355289	28.0949	0.250497	0.656264	2.83217	42.9968	HL12_17_Zr6	WJL	Zrn	3.52799	0.00344408	0.261517	0.0120943	0.201879	0.00179998	N/A	N/A	0.771954	HL12_17_Zr6	WJL	Zrn	93.7112	3.55211	0.784905	7	119.392	9.50405	3.55211
HL12_17_Zr6	WJL	Zrn	193.2	95.2	193.2	73.8	6.3118	52.0028	HL12_17_Zr7	WJL	Zrn	28.6548	0.0203987	48.1259	0.0342599	30.4027	1.32786	0	0	55.2705	HL12_17_Zr7	WJL	Zrn	4.05379	0.00288581	0.303761	0.00391808	0.191896	0.00838116	N/A	N/A	0.631732	HL12_17_Zr7	WJL	Zrn	95.3717	1.17233	0.777548	7	122.657	8.71736	1.17233
HL12_17_Zr7	WJL	Zrn	166.4	82.6	166.1	79.6	5.08286	48.9069	HL12_17_Zr8	WJL	Zrn	251.497	0.2927	183.81	0.213923	420.287	6.55488	0	0	282.577	HL12_17_Zr8	WJL	Zrn	28.6519	0.0333459	0.934278	0.0314453	2.13626	0.0333175	N/A	N/A	2.28654	HL12_17_Zr8	WJL	Zrn	162.802	3.5598	0.759073	7	214.475	15.7286	3.5598
HL12_17_Zr8	WJL	Zrn	150.1	98.5	150.1	71.5	4.91559	49.6826	HL12_18_Zr1	WJL	Zrn	67.197	0.0706246	256.572	4.78676	212.6	2.04728	0.416607	4.31556	306.533	HL12_18_Zr1	WJL	Zrn	7.4035	0.00778114	1.2612	0.0235298	1.04505	0.0100636	N/A	N/A	0.828616	HL12_18_Zr1	WJL	Zrn	40.5028	0.61662	0.767141	7.969	52.7971	4.2835	0.61662
HL12_18_Zr1	WJL	Zrn	154.6	75.7	151.5	74.2	3.99748	45.2451	HL12_18_Zr2	WJL	Zrn	67.9653	0.0403577	118.561	0.0704015	74.9823	2.00678	0	0	136.182	HL12_18_Zr2	WJL	Zrn	6.08955	0.00361596	0.473946	0.0113125	0.29974	0.00802206	N/A	N/A	0.632435	HL12_18_Zr2	WJL	Zrn	91.8362	1.8751	0.747195	7	122.908	8.96209	1.8751
HL12_18_Zr2	WJL	Zrn	116.8	51.2	116.1	47.1	1.30582	30.4547	HL12_18_Zr3	WJL	Zrn	186.428	0.158462	378.519	0.321737	81.5802	2.32422	0	0	397.69	HL12_18_Zr3	WJL	Zrn	5.4564	0.00463789	0.494277	0.020715	0.106529	0.00303502	N/A	N/A	0.215525	HL12_18_Zr3	WJL	Zrn	86.3358	3.33832	0.643479	7	134.17	10.7295	3.33832
HL12_18_Zr3	WJL	Zrn	135.9	58.2	135.9	60.1	2.21039	36.4337	HL12_18_Zr4	WJL	Zrn	65.2206	0.0518022	136.806	0.10866	111.778	1.99695	0	0	163.074	HL12_18_Zr4	WJL	Zrn	3.23122	0.00256643	0.302396	0.00729339	0.247073	0.00441406	N/A	N/A	0.817052	HL12_18_Zr4	WJL	Zrn	73.6944	1.4593	0.691661	7	106.547	7.75096	1.4593
HL12_18_Zr4	WJL	Zrn	160.9	63.6	160.9	48.8	2.32213	35.8833	HL12_18_Zr5	WJL	Zrn	23.2299	0.0399035	62.3055	0.107026	69.7145	1.55494	29.6017	65.4174	78.6884	HL12_18_Zr5	WJL	Zrn	1.20905	0.00207686	0.144681	0.00496257	0.161886	0.00361077	N/A	N/A	1.11891	HL12_18_Zr5	WJL	Zrn	54.2976	1.49351	0.685908	7	79.1617	5.95377	1.49351
HL12_18_Zr5	WJL	Zrn	202.1	107.7	200	105.6	10.6325	63.2885	HL12_19_Zr1	WJL	Zrn	17.6016	0.0176844	45.8992	1.12945	23.2797	0.238465	0.169675	2.07178	51.37	HL12_19_Zr1	WJL	Zrn	4.19469	0.00421443	0.488025	0.0120089	0.247522	0.00253548	N/A	N/A	0.507192	HL12_19_Zr1	WJL	Zrn	63.2116	1.34857	0.815217	7	77.5396	5.67426	1.34857
HL12_19_Zr1	WJL	Zrn	210.7	80.9	210.7	71	5.62761	48.2638	HL12_19_Zr2	WJL	Zrn	27.4944	0.0150233	115.653	2.386	50.5954	0.867052	0	0	127.543	HL12_19_Zr2	WJL	Zrn	3.46801	0.00189496	0.650851	0.0134275	0.284731	0.00487944	N/A	N/A	0.437475	HL12_19_Zr2	WJL	Zrn	39.8545	0.724911	0.762634	10.7411	52.259	5.69311	0.724911
HL12_19_Zr2	WJL	Zrn	199.8	84.7	199.8	67.4	5.30386	47.918	HL12_19_Zr3	WJL	Zrn	99.7921	0.105577	354.929	4.82482	103.721	2.29247	0	0	379.303	HL12_19_Zr3	WJL	Zrn	11.8631	0.0125509	1.88249	0.0255902	0.550122	0.0121589	N/A	N/A	0.292231	HL12_19_Zr3	WJL	Zrn	48.6142	0.605032	0.761807	10.7013	63.8143	6.87502	0.605032
HL12_19_Zr3	WJL	Zrn	146.2	56.3	145.2	57.2	2.18181	35.6445	HL12_19_Zr4	WJL	Zrn	72.3097	0.0652627	226.718	3.59342	89.3074	1.188	0	0	247.705	HL12_19_Zr4	WJL	Zrn	3.53611	0.00319149	0.494655	0.00784015	0.194852	0.002592	N/A	N/A	0.393914	HL12_19_Zr4	WJL	Zrn	53.907	0.761114	0.688157	22.1547	78.3354	17.3902	0.761114
HL12_19_Zr4	WJL	Zrn	174.7	70.1	174.7	64.4	3.66733	42.2966	HL12_19_Zr5	WJL	Zrn	48.0744	0.0374212	119.726	3.55427	55.2321	0.76224	33.5843	76.7035	132.705	HL12_19_Zr5	WJL	Zrn	3.95162	0.00307595	0.439073	0.0130347	0.202554	0.00279538	N/A	N/A	0.461322	HL12_19_Zr5	WJL	Zrn	66.6784	1.7571	0.732129	14.9811	91.0748	13.8535	1.7571
HL12_19_Zr5	WJL	Zrn	143.2	63.9	143.2	52.4	2.22961	36.252	HL12_19_Zr6	WJL	Zrn	25.3454	0.0277544	82.4691	2.79558	33.1613	0.748262	0	0	90.262	HL12_19_Zr6	WJL	Zrn	1.2666	0.00138698	0.183874	0.00623304	0.0739367	0.00166833	N/A	N/A	0.402106	HL12_19_Zr6	WJL	Zrn	51.8621	1.55938	0.692746	21.0683	74.8646	15.9325	1.55938
HL12_19_Zr6	WJL	Zrn	171	68.7	171	53.3	2.91161	38.8251	HL12_19_Zr7	WJL	Zrn	53.864	0.0621434	118.861	2.22083	69.2566	0.879524	3.58372	7.72835	135.137	HL12_19_Zr7	WJL	Zrn	3.51515	0.00405546	0.346077	0.00646618	0.201648	0.00256083	N/A	N/A	0.582667	HL12_19_Zr7	WJL	Zrn	73.4477	1.17688	0.709931	18.9802	103.458	19.7063	1.17688
HL12_19_Zr7	WJL	Zrn	150.2	54.7	150.5	46.2	1.76679	32.3967	HL12_19_Zr8	WJL	Zrn	22.5706	0.0348003	92.7429	1.84298	82.3015	0.311469	0.82792	12.0858	112.084	HL12_19_Zr8	WJL	Zrn	0.893799	0.0013781	0.163858	0.00325617	0.14541	0.000550301	N/A	N/A	0.887416	HL12_19_Zr8	WJL	Zrn	37.2112	0.595934	0.657625	27.5385	56.5843	15.6088	0.595934
HL12_19_Zr8	1Equivalent spherical radius									2Effective uranium																								3Alpha-ejection correction			4Calculated by dividing raw date by alpha-ejection correction
									Table S1c. Continued												Table S1c. Continued												Table S1c. Continued
Table S1c. (U-Th)/He analyses of samples from Oscar II Land, Southwestern Province, Svalbard	Region	Mineral	length 1 (μm)	width 1 (μm)	length 2 (μm)	width 2 (μm)	Dim Mass (μg)	ESR1 (μm)	Sample Name	Region	Mineral	4He (nmol/g)	±	U (ppm)	±	Th (ppm)	±	Sm (ppm)	±	eU2 (ppm)	Sample Name	Region	Mineral	4He (ncc)	±	U (ng)	±	Th (ng)	±	Sm (ng)	±	Th/U	Sample Name	Region	Mineral	Raw Date (Ma)	±	Ft3	± (%)	Corrected4 Date (Ma)	Full Unc. (Ma)	Analytic Unc. (Ma)
Sample Name	OII	Zrn	182.2	91.9	182.2	72.1	2.93935	47.8602	CB15_OII_1_Zr1	OII	Zrn	163.088	0.215627	649.441	7.7866	305.137	4.71852	N/A	N/A	721.148	CB15_OII_1_Zr1	OII	Zrn	10.7445	0.0142058	1.90893	0.0228875	0.896902	0.0138694	N/A	N/A	0.469845	CB15_OII_1_Zr1	OII	Zrn	41.8004	0.445112	0.752509	7	55.464	3.88248	0.445112
CB15_OII_1_Zr1	OII	Zrn	218.8	88	218.8	82.2	3.85348	51.2577	CB15_OII_1_Zr2	OII	Zrn	87.3371	0.0500434	288.895	3.78788	138.165	2.71023	N/A	N/A	321.364	CB15_OII_1_Zr2	OII	Zrn	7.54334	0.00432227	1.11325	0.0145965	0.532418	0.0104438	N/A	N/A	0.478255	CB15_OII_1_Zr2	OII	Zrn	50.1911	0.582109	0.768663	7	65.1911	4.56338	0.582109
CB15_OII_1_Zr2	OII	Zrn	144.7	115.1	144.7	95	3.85229	56.9195	CB15_OII_1_Zr3	OII	Zrn	87.1034	0.0893633	316.093	7.07285	233.278	5.2034	N/A	N/A	370.913	CB15_OII_1_Zr3	OII	Zrn	7.52083	0.00771595	1.21768	0.0272467	0.898654	0.020045	N/A	N/A	0.738004	CB15_OII_1_Zr3	OII	Zrn	43.3805	0.814353	0.789554	7	54.8738	3.84117	0.814353
CB15_OII_1_Zr3	OII	Zrn	151.9	61.5	151.9	53.1	1.20776	34.4429	CB15_OII_1_Zr4	OII	Zrn	42.3404	0.0558666	207.429	3.23448	115.421	1.54895	N/A	N/A	234.553	CB15_OII_1_Zr4	OII	Zrn	1.14616	0.00151232	0.250524	0.00390646	0.139401	0.00187075	N/A	N/A	0.556437	CB15_OII_1_Zr4	OII	Zrn	33.3858	0.450772	0.658367	7	50.6093	3.54265	0.450772
CB15_OII_1_Zr4	OII	Zrn	177.6	88	177.6	67.6	2.57231	45.4127	CB15_OII_1_Zr5	OII	Zrn	45.2918	0.0394647	154.652	2.19806	152.127	2.02311	N/A	N/A	190.402	CB15_OII_1_Zr5	OII	Zrn	2.61129	0.00227533	0.397814	0.0056541	0.391317	0.00520408	N/A	N/A	0.983669	CB15_OII_1_Zr5	OII	Zrn	43.9294	0.504193	0.735465	7	59.6303	4.17412	0.504193
CB15_OII_1_Zr5	OII	Zrn	178.9	127.9	178.9	172.8	9.62667	77.5684	CB15_OII_1_Zr6	OII	Zrn	203.802	0.183708	808.643	9.44985	379.086	4.5603	N/A	N/A	897.728	CB15_OII_1_Zr6	OII	Zrn	43.9739	0.0396383	7.78454	0.0909706	3.64934	0.0439005	N/A	N/A	0.468793	CB15_OII_1_Zr6	OII	Zrn	41.9607	0.432175	0.846448	7	49.531	3.46717	0.432175
CB15_OII_1_Zr6	OII	Zrn	166.8	106.7	166.8	85.2	3.69191	54.215	CB15_OII_1_Zr7	OII	Zrn	79.4669	0.0648511	248.465	3.29331	109.688	1.53067	N/A	N/A	274.242	CB15_OII_1_Zr7	OII	Zrn	6.57581	0.00536637	0.917313	0.0121586	0.404958	0.00565112	N/A	N/A	0.441461	CB15_OII_1_Zr7	OII	Zrn	53.5078	0.627555	0.781263	7	68.3813	4.78669	0.627555
CB15_OII_1_Zr7	OII	Zrn	143.5	92.8	143.5	82.2	3.01286	47.207	CB15_OII_1_Zr8	OII	Zrn	53.8489	0.0600609	176.106	2.23109	235.24	2.77716	N/A	N/A	231.387	CB15_OII_1_Zr8	OII	Zrn	3.63637	0.00405586	0.530583	0.00672196	0.708747	0.0083672	N/A	N/A	1.33579	CB15_OII_1_Zr8	OII	Zrn	42.9636	0.421339	0.75559	7	56.7797	3.97458	0.421339
CB15_OII_1_Zr8	OII	Zrn	217.1	139.8	217.1	137.7	10.1754	77.9563	CB15_OII_4_Zr1	OII	Zrn	69.8704	0.0573086	278.024	4.45109	121.51	2.17066	N/A	N/A	306.579	CB15_OII_4_Zr1	OII	Zrn	15.9352	0.0130702	2.82901	0.0452918	1.23642	0.0220874	N/A	N/A	0.43705	CB15_OII_4_Zr1	OII	Zrn	42.1262	0.59727	0.847341	7	49.6741	3.47719	0.59727
CB15_OII_4_Zr1	OII	Zrn	175.7	93.1	175.7	95.1	3.78751	54.5242	CB15_OII_4_Zr2	OII	Zrn	48.1511	0.0620536	184.323	3.32477	208.043	1.8964	N/A	N/A	233.214	CB15_OII_4_Zr2	OII	Zrn	4.08763	0.00526784	0.698127	0.0125926	0.787963	0.00718262	N/A	N/A	1.12868	CB15_OII_4_Zr2	OII	Zrn	38.1324	0.53285	0.7782	7	48.9407	3.42585	0.53285
CB15_OII_4_Zr2	OII	Zrn	159.9	66	159.9	71.5	2.50146	42.0123	CB15_OII_4_Zr3	OII	Zrn	68.3058	0.0397804	349.555	6.72046	109.534	1.58604	N/A	N/A	375.296	CB15_OII_4_Zr3	OII	Zrn	3.82968	0.00223035	0.874398	0.016811	0.273994	0.00396741	N/A	N/A	0.313352	CB15_OII_4_Zr3	OII	Zrn	33.6743	0.585185	0.734398	7	45.789	3.20523	0.585185
CB15_OII_4_Zr3	OII	Zrn	159.8	143.6	159.8	127.4	7.11791	71.0032	CB15_OII_4_Zr4	OII	Zrn	30.4575	0.0227205	98.5597	1.26433	97.9812	2.04783	N/A	N/A	121.585	CB15_OII_4_Zr4	OII	Zrn	4.85913	0.00362478	0.701539	0.00899937	0.697421	0.0145762	N/A	N/A	0.994131	CB15_OII_4_Zr4	OII	Zrn	46.2479	0.501564	0.829666	7	55.6866	3.89806	0.501564
CB15_OII_4_Zr4	OII	Zrn	167.8	81	167.8	63.3	2.09475	42.3088	CB15_OII_4_Zr5	OII	Zrn	17.9115	0.0308651	61.3851	1.00155	40.4105	0.576312	N/A	N/A	70.8816	CB15_OII_4_Zr5	OII	Zrn	0.84096	0.00144914	0.128587	0.00209799	0.08465	0.00120723	N/A	N/A	0.658311	CB15_OII_4_Zr5	OII	Zrn	46.632	0.654264	0.719119	7	64.7046	4.52932	0.654264
CB15_OII_4_Zr5	OII	Zrn	178.6	82.7	178.6	78.9	2.83737	47.8982	CB15_OII_4_Zr6	OII	Zrn	59.573	0.0757323	231.107	2.99101	158.667	2.51065	N/A	N/A	268.394	CB15_OII_4_Zr6	OII	Zrn	3.78858	0.00481625	0.655735	0.00848658	0.450198	0.00712362	N/A	N/A	0.686554	CB15_OII_4_Zr6	OII	Zrn	41.0161	0.454554	0.751118	7	54.5256	3.81679	0.454554
CB15_OII_4_Zr6	OII	Zrn	151.6	108.8	151.6	75.5	3.03198	50.4553	CB15_OII_4_Zr7	OII	Zrn	43.7971	0.0431718	182.552	4.21095	100.707	1.27712	N/A	N/A	206.219	CB15_OII_4_Zr7	OII	Zrn	2.97635	0.00293385	0.553495	0.0127675	0.305343	0.00387221	N/A	N/A	0.551663	CB15_OII_4_Zr7	OII	Zrn	39.259	0.778946	0.764413	7	51.289	3.59023	0.778946
CB15_OII_4_Zr7	OII	Zrn	231.3	193.6	231.3	211	23.0046	105.258	CB15_OII_7_Zr1	OII	Zrn	28.2715	0.0230238	93.7083	1.00959	67.2296	0.754944	N/A	N/A	109.507	CB15_OII_7_Zr1	OII	Zrn	14.5772	0.0118714	2.15572	0.0232253	1.54659	0.0173672	N/A	N/A	0.717435	CB15_OII_7_Zr1	OII	Zrn	47.6787	0.434102	0.885726	7	53.795	3.76565	0.434102
CB15_OII_7_Zr1	OII	Zrn	161.1	142.6	161.1	124.4	6.95804	70.3215	CB15_OII_7_Zr2	OII	Zrn	105.714	0.084036	432.187	4.20089	132.786	1.70452	N/A	N/A	463.392	CB15_OII_7_Zr2	OII	Zrn	16.4866	0.0131058	3.00718	0.02923	0.923933	0.0118602	N/A	N/A	0.307243	CB15_OII_7_Zr2	OII	Zrn	42.1768	0.373567	0.831655	7	50.6664	3.54665	0.373567
CB15_OII_7_Zr2	OII	Zrn	233.3	116.6	233.3	117.4	7.77558	68.464	CB15_OII_7_Zr3	OII	Zrn	24.9921	0.0298404	82.64	0.921523	39.0763	0.350501	N/A	N/A	91.8229	CB15_OII_7_Zr3	OII	Zrn	4.3556	0.00520056	0.642574	0.00716538	0.303841	0.00272535	N/A	N/A	0.47285	CB15_OII_7_Zr3	OII	Zrn	50.2713	0.494124	0.826177	7	60.7799	4.25459	0.494124
CB15_OII_7_Zr3	OII	Zrn	215.3	89.4	215.3	77.3	3.62254	49.9839	CB15_OII_7_Zr4	OII	Zrn	44.149	0.0453997	176.231	2.34871	119.251	2.40782	N/A	N/A	204.255	CB15_OII_7_Zr4	OII	Zrn	3.58464	0.00368618	0.638403	0.00850829	0.431989	0.00872241	N/A	N/A	0.676672	CB15_OII_7_Zr4	OII	Zrn	39.9462	0.460094	0.761335	7	52.3963	3.66774	0.460094
CB15_OII_7_Zr4	OII	Zrn	138.8	75.9	138.8	70.3	1.80318	42.4016	CB15_OII_7_Zr5	OII	Zrn	57.149	0.0710884	295.224	3.54146	115.757	0.956103	N/A	N/A	322.427	CB15_OII_7_Zr5	OII	Zrn	2.30972	0.00287308	0.53234	0.00638587	0.208731	0.00172402	N/A	N/A	0.392101	CB15_OII_7_Zr5	OII	Zrn	32.7919	0.351827	0.722183	7	45.34	3.1738	0.351827
CB15_OII_7_Zr5	OII	Zrn	160.1	92.1	160.1	94.2	3.38184	53.2455	CB15_OII_7_Zr6	OII	Zrn	86.7311	0.0457631	371.715	4.14904	99.0775	1.35291	N/A	N/A	394.998	CB15_OII_7_Zr6	OII	Zrn	6.57416	0.00346881	1.25708	0.0140314	0.335065	0.00457533	N/A	N/A	0.266542	CB15_OII_7_Zr6	OII	Zrn	40.6	0.414934	0.778785	7	52.0648	3.64454	0.414934
CB15_OII_7_Zr6	OII	Zrn	229.6	97.9	229.6	74.4	5.7893	53.3313	CB15_OII_7_Zr7	OII	Zrn	31.4912	0.0255191	146.242	1.468	75.9372	1.14133	N/A	N/A	164.087	CB15_OII_7_Zr7	OII	Zrn	4.08627	0.00331133	0.846639	0.00849868	0.439623	0.00660749	N/A	N/A	0.519257	CB15_OII_7_Zr7	OII	Zrn	35.4868	0.314182	0.786197	7	45.0872	3.15611	0.314182
CB15_OII_7_Zr7	OII	Zrn	171.5	85.3	171.5	81	3.7278	49.1548	CB15_OII_7_Zr8	OII	Zrn	85.7292	0.0355936	314.461	3.99347	89.7149	1.22636	N/A	N/A	335.544	CB15_OII_7_Zr8	OII	Zrn	7.16296	0.00297396	1.17225	0.0148869	0.334439	0.00457162	N/A	N/A	0.285297	CB15_OII_7_Zr8	OII	Zrn	47.2116	0.546035	0.771154	7	61.1292	4.27904	0.546035
CB15_OII_7_Zr8	1Equivalent spherical radius									2Effective uranium																								3Alpha-ejection correction			4Calculated by dividing raw date by alpha-ejection correction
									Table S1d. Continued												Table S1d. Continued												Table S1d. Continued
Table S1d. (U-Th)/He analyses of samples from Prins Karls Forland, Southwestern Province, Svalbard	Region	Mineral	length 1 (μm)	width 1 (μm)	length 2 (μm)	width 2 (μm)	Dim Mass (μg)	ESR1 (μm)	Sample Name	Region	Mineral	4He (nmol/g)	±	U (ppm)	±	Th (ppm)	±	Sm (ppm)	±	eU2 (ppm)	Sample Name	Region	Mineral	4He (ncc)	±	U (ng)	±	Th (ng)	±	Sm (ng)	±	Th/U	Sample Name	Region	Mineral	Raw Date (Ma)	±	Ft3	± (%)	Corrected4 Date (Ma)	Full Unc. (Ma)	Analytic Unc. (Ma)
Sample Name	PKF	Zrn	127.6	75.8	125.1	59.6	2.65426	40.1294	HL12_02_Zr1	PKF	Zrn	20.8568	0.0382479	167.745	2.85824	50.2387	2.07795	0	0	179.551	HL12_02_Zr1	PKF	Zrn	1.2408	0.00227543	0.445239	0.00758651	0.133347	0.00551543	N/A	N/A	0.299494	HL12_02_Zr1	PKF	Zrn	21.5158	0.339179	0.720064	14.724	29.8804	4.42472	0.339179
HL12_02_Zr1	PKF	Zrn	167.4	69	167.4	42.4	2.27732	35.8163	HL12_02_Zr2	PKF	Zrn	17.04	0.0277061	174.775	0.284174	73.3963	0.570562	29.7021	44.0024	192.023	HL12_02_Zr2	PKF	Zrn	0.869769	0.0014142	0.398017	0.00938539	0.167147	0.00129935	N/A	N/A	0.419948	HL12_02_Zr2	PKF	Zrn	16.4193	0.343345	0.689314	7	23.8198	1.74019	0.343345
HL12_02_Zr2	PKF	Zrn	162.1	106.7	162.3	105.5	8.49025	59.954	HL12_02_Zr3	PKF	Zrn	23.8935	0.0250491	149.829	0.157076	124.493	3.50924	2.29515	2.7196	179.085	HL12_02_Zr3	PKF	Zrn	4.54687	0.00476677	1.27209	0.0332314	1.05698	0.0297943	N/A	N/A	0.830903	HL12_02_Zr3	PKF	Zrn	24.6807	0.534797	0.804411	7	30.6817	2.24826	0.534797
HL12_02_Zr3	PKF	Zrn	204.3	203.3	204.3	135.8	26.2276	89.8704	HL12_03_Zr1	PKF	Zrn	9.31935	0.0092954	53.1282	1.28802	43.7018	1.06715	N/A	N/A	63.3981	HL12_03_Zr1	PKF	Zrn	5.47842	0.00546434	1.39342	0.0337817	1.14619	0.0151359	N/A	N/A	0.822574	HL12_03_Zr1	PKF	Zrn	27.1899	0.538225	0.866729	7	31.3707	2.28206	0.538225
HL12_03_Zr1	PKF	Zrn	216.2	108.5	213.5	110.4	11.9671	65.5064	HL12_03_Zr2	PKF	Zrn	6.44836	0.00783273	37.6894	1.67817	29.0232	1.30163	N/A	N/A	44.5098	HL12_03_Zr2	PKF	Zrn	1.72961	0.00210093	0.45103	0.0200827	0.347322	0.00699038	N/A	N/A	0.770063	HL12_03_Zr2	PKF	Zrn	26.8003	0.981585	0.820203	7	32.6753	2.58144	0.981585
HL12_03_Zr2	PKF	Zrn	185.3	108.4	184.5	84.9	7.91274	57.4936	HL12_03_Zr3	PKF	Zrn	54.6926	0.0363083	353.926	5.99358	146.511	2.49903	N/A	N/A	388.356	HL12_03_Zr3	PKF	Zrn	9.69989	0.00643939	2.80052	0.0474257	1.1593	0.0192936	N/A	N/A	0.413959	HL12_03_Zr3	PKF	Zrn	26.0693	0.391797	0.798232	7	32.6588	2.33821	0.391797
HL12_03_Zr3	PKF	Zrn	171.1	72.5	171.1	65.5	3.77818	43.0663	HL12_03_Zr4	PKF	Zrn	12.6456	0.0199815	91.7511	1.92395	56.4722	1.19274	N/A	N/A	105.022	HL12_03_Zr4	PKF	Zrn	1.07086	0.00169209	0.346652	0.00726904	0.213362	0.00847669	N/A	N/A	0.615494	HL12_03_Zr4	PKF	Zrn	22.2884	0.412447	0.735666	14.0042	30.297	4.27973	0.412447
HL12_03_Zr4	PKF	Zrn	183.3	63	182.5	73.3	3.92745	43.1003	HL12_03_Zr5	PKF	Zrn	9.33642	0.0129501	72.1561	2.04605	34.4998	0.98534	N/A	N/A	80.2636	HL12_03_Zr5	PKF	Zrn	0.82187	0.00113997	0.28339	0.00803576	0.135496	0.00549448	N/A	N/A	0.478127	HL12_03_Zr5	PKF	Zrn	21.5384	0.539683	0.736572	14.4709	29.2414	4.29446	0.539683
HL12_03_Zr5	PKF	Zrn	151.3	83	150.5	67	3.90207	45.0775	HL12_03_Zr6	PKF	Zrn	13.8072	0.0194821	64.1487	3.35271	106.502	5.60652	N/A	N/A	89.1767	HL12_03_Zr6	PKF	Zrn	1.20757	0.0017039	0.250313	0.0130825	0.415579	0.0113972	N/A	N/A	1.66024	HL12_03_Zr6	PKF	Zrn	28.6049	1.06309	0.74225	11.129	38.5381	4.52173	1.06309
HL12_03_Zr6	PKF	Zrn	175	107.8	172	93.9	8.16652	58.7183	HL12_07_Zr2	PKF	Zrn	4.27176	0.00621725	25.4468	1.15797	14.9867	0.686907	N/A	N/A	28.9686	HL12_07_Zr2	PKF	Zrn	0.781907	0.00113801	0.207811	0.00945657	0.122389	0.00569266	N/A	N/A	0.588944	HL12_07_Zr2	PKF	Zrn	27.2855	1.06764	0.801458	7	34.0449	2.73019	1.06764
HL12_07_Zr2	PKF	Zrn	181	118.2	181.8	120.6	12.0242	67.3392	HL12_07_Zr3	PKF	Zrn	16.4525	0.0153644	95.1397	1.65118	47.3703	0.828066	N/A	N/A	106.272	HL12_07_Zr3	PKF	Zrn	4.43402	0.00414078	1.14398	0.019854	0.569589	0.0122306	N/A	N/A	0.497903	HL12_07_Zr3	PKF	Zrn	28.6472	0.436514	0.825728	7	34.6933	2.4854	0.436514
HL12_07_Zr3	PKF	Zrn	162.8	90.4	162.3	88	6.013	52.5136	HL12_07_Zr4	PKF	Zrn	26.837	0.0169011	160.504	3.45409	80.2896	1.74034	N/A	N/A	179.372	HL12_07_Zr4	PKF	Zrn	3.61691	0.00227781	0.965112	0.0207694	0.482781	0.0124131	N/A	N/A	0.500233	HL12_07_Zr4	PKF	Zrn	27.6874	0.521842	0.780121	7.25013	35.4912	2.65868	0.521842
HL12_07_Zr4	PKF	Zrn	223.5	96.9	218.3	89.5	8.90831	57.8402	HL12_07_Zr5	PKF	Zrn	39.7229	0.0416725	275.414	5.34174	80.0489	1.56379	N/A	N/A	294.226	HL12_07_Zr5	PKF	Zrn	7.93136	0.00832065	2.45348	0.0475859	0.713101	0.0236099	N/A	N/A	0.290649	HL12_07_Zr5	PKF	Zrn	24.9994	0.443509	0.799897	7	31.2533	2.2569	0.443509
HL12_07_Zr5	PKF	Zrn	160.8	72.2	167.9	64.7	3.56997	42.3283	HL12_07_Zr6	PKF	Zrn	16.348	0.0122545	123.831	2.98203	39.7747	0.964756	N/A	N/A	133.178	HL12_07_Zr6	PKF	Zrn	1.30809	0.000980551	0.442073	0.0106458	0.141994	0.00212107	N/A	N/A	0.321202	HL12_07_Zr6	PKF	Zrn	22.7333	0.493752	0.733105	14.3045	31.0097	4.48662	0.493752
HL12_07_Zr6	PKF	Zrn	158.3	86.9	158.2	71.6	4.57857	47.538	HL12_07_Zr7	PKF	Zrn	48.8357	0.0420876	318.297	11.9071	142.999	5.38806	N/A	N/A	351.901	HL12_07_Zr7	PKF	Zrn	5.01162	0.00431911	1.45734	0.0545173	0.65473	0.0191764	N/A	N/A	0.449263	HL12_07_Zr7	PKF	Zrn	25.6882	0.844782	0.759251	9.53674	33.8336	3.41308	0.844782
HL12_07_Zr7	PKF	Zrn	185	75	188.2	99.7	6.48815	53.0002	KK14_31_Zr1	PKF	Zrn	28.9962	0.0471302	216.606	4.61152	46.5363	0.997911	0.156993	0.00336651	227.542	KK14_31_Zr1	PKF	Zrn	4.21671	0.0068538	1.40537	0.0299202	0.301935	0.0103454	N/A	N/A	0.214843	KK14_31_Zr1	PKF	Zrn	23.6029	0.466523	0.783334	7	30.1313	2.19166	0.466523
KK14_31_Zr1	PKF	Zrn	167.4	101.8	169	109.2	8.6946	60.1659	KK14_31_Zr2	PKF	Zrn	9.96773	0.015146	59.5294	1.54541	64.5754	1.68853	0	0	74.7046	KK14_31_Zr2	PKF	Zrn	1.94248	0.00295162	0.517584	0.0134368	0.561457	0.0106238	N/A	N/A	1.08477	KK14_31_Zr2	PKF	Zrn	24.6758	0.504127	0.804227	7	30.6826	2.23739	0.504127
KK14_31_Zr2	PKF	Zrn	181.9	73.3	179.8	59.3	3.65536	42.0599	KK14_31_Zr3	PKF	Zrn	19.0745	0.0689178	144.599	6.1663	45.7582	1.96542	2.2546	0.0968402	155.352	KK14_31_Zr3	PKF	Zrn	1.56277	0.00564642	0.52856	0.02254	0.167263	0.00440955	N/A	N/A	0.31645	KK14_31_Zr3	PKF	Zrn	22.7364	0.878593	0.731591	7	31.078	2.48493	0.878593
KK14_31_Zr3	PKF	Zrn	162.8	102.7	166.8	103	8.10621	58.6205	KK14_31_Zr4	PKF	Zrn	34.0877	0.0261959	203.298	5.58181	155.082	4.28873	0.588299	0.0162692	239.742	KK14_31_Zr4	PKF	Zrn	6.19338	0.00475952	1.64798	0.0452473	1.25712	0.0546243	N/A	N/A	0.762829	KK14_31_Zr4	PKF	Zrn	26.3035	0.618167	0.800498	7	32.8589	2.4263	0.618167
KK14_31_Zr4	1Equivalent spherical radius									2Effective uranium																								3Alpha-ejection correction			4Calculated by dividing raw date by alpha-ejection correction
